# Supplementary material
Source: PubMed Central journal article supplement (PMC3129786)
Supplement: NIHMS288358-supplement-Web_appendix.pdf [file NIHMS288358-supplement-Web_appendix.pdf]

**Understanding the Early Origins of the Education-Health  
Gradient - A Framework That Can Also Be Applied to Analyze  
Gene-Environment Interactions**

Gabriella Conti  
University of Chicago

James J. Heckman  
University of Chicago  
and University College Dublin

November 29, 2010

**Web Appendix**

## A Measurement System

As indicators of cognitive ability we use the following seven test scores administered to the children at age ten:

- the Picture Language Comprehension Test: this is a new test specifically developed for the BCS70 on the basis of the American Peabody Picture Vocabulary Test and the English Picture Vocabulary Test; it covers vocabulary, sequence and sentence comprehension.
- the Friendly Math Test: this is a new test specifically designed for the BCS70; it covers arithmetic, fractions, algebra, geometry and statistics.
- the Shortened Edinburgh Reading Test: this is a shortened version of the Edinburgh Reading Test, which is a test of word recognition particularly designed to capture poor readers; it covers vocabulary, syntax, sequencing, comprehension, and retention.
- the four British Ability Scales: they measure a construct similar to IQ, and include two verbal scales (Word Definition and Word Similarities) and two non-verbal scales (Recall Digits and Matrices).

We performed a preliminary factor analysis of these measurements. Both [Velicer \(1976\)](#) minimum average partial correlation criterion and [Kaiser \(1960\)](#) eigenvalue rule suggested to retain one component.

As measurements of noncognitive ability we use six scales collected at age ten:

- the locus of control (caraloc) scale: this is administered to the child and includes sixteen items which measure whether an individual's locus of control is external or internal;
- a perseverance scale: this is administered to the teacher, who answers to the question "How much perseverance does the child show in face of difficult tasks?" on a scale from 1 to 47;
- a cooperativeness scale: this is administered to the teacher, who makes an estimate of how cooperative is the child with his peers, on a scale from 1 to 47;
- a completeness scale: this is administered to the teacher, who assesses "The child completes tasks which are started", on a scale from 1 to 47;
- an attentiveness scale: this is administered to the teacher, who assesses "Child pays attention to what is being explained in class", on a scale from 1 to 47;
- a persistence scale: this is administered to the teacher, who assesses "Child shows perseverance, persists with difficult or routine work", on a scale from 1 to 47.

We performed a preliminary factor analysis of these measurements. Both [Velicer \(1976\)](#) minimum average partial correlation criterion and [Kaiser \(1960\)](#) eigenvalue rule suggested to retain one component. The Cronbach's alpha reliability coefficient for this scale is 0.81.

Finally, we use the following measures for the health endowment, recorded at age ten:

- height (recorded during the medical visit);
- head circumference (recorded during the medical visit);
- father's height;

- mother's height.

We performed a preliminary factor analysis of these measurements. Both [Velicer \(1976\)](#) minimum average partial correlation criterion and [Kaiser \(1960\)](#) eigenvalue rule suggested to retain one component.

**Table A.1:** Summary Statistics: Outcomes

|               | Males      |      |      |                 |      |          | Females    |      |      |                 |      |          |      |      |      |      |      |          |      |      |   |   |   |      |
|---------------|------------|------|------|-----------------|------|----------|------------|------|------|-----------------|------|----------|------|------|------|------|------|----------|------|------|---|---|---|------|
|               | Compulsory |      |      | Post-Compulsory |      |          | Compulsory |      |      | Post-Compulsory |      |          |      |      |      |      |      |          |      |      |   |   |   |      |
|               | Mean       | S.D. | 0.60 | Min.            | Max. | <i>n</i> | Mean       | S.D. | 0.40 | Min.            | Max. | <i>n</i> | Mean | S.D. | 0.50 | Min. | Max. | <i>n</i> |      |      |   |   |   |      |
| Daily Smoking | 0.38       | 0.48 | 0    | 0               | 1    | 1585     | 0.19       | 0.39 | 0    | 0               | 1    | 1069     | 0.37 | 0.48 | 0    | 0    | 1    | 1431     | 0.17 | 0.37 | 0 | 0 | 1 | 1428 |
| Poor Health   | 0.17       | 0.38 | 0    | 0               | 1    | 1587     | 0.11       | 0.31 | 0    | 0               | 1    | 1071     | 0.18 | 0.38 | 0    | 0    | 1    | 1431     | 0.10 | 0.29 | 0 | 0 | 1 | 1429 |
| Obesity       | 0.13       | 0.33 | 0    | 0               | 1    | 1560     | 0.09       | 0.29 | 0    | 0               | 1    | 1048     | 0.35 | 0.48 | 0    | 0    | 1    | 1383     | 0.29 | 0.45 | 0 | 0 | 1 | 1390 |

Source: [Conti et al. \(2010a,b\)](#)

**Table A.2:** Summary Statistics: Measurements

|                                     | Males  |       |      |      | Females |        |       |      |      |      |
|-------------------------------------|--------|-------|------|------|---------|--------|-------|------|------|------|
|                                     | Mean   | S.D.  | Min. | Max. | Mean    | S.D.   | Min.  | Max. | $n$  |      |
| <i>Cognitive Scores (Age 10)</i>    |        |       |      |      |         |        |       |      |      |      |
| Picture Language Comprehension Test | 41.83  | 7.29  | 18   | 71   | 3769    | 40.30  | 7.15  | 17   | 71   | 3614 |
| Friendly Math Test                  | 45.20  | 12.48 | 1    | 72   | 3770    | 43.98  | 11.23 | 4    | 72   | 3614 |
| Shortened Edinburgh Reading Test    | 45.10  | 15.55 | 1    | 74   | 3772    | 47.36  | 14.46 | 0    | 74   | 3618 |
| BAS Matrices                        | 15.35  | 5.39  | 0    | 28   | 3777    | 15.88  | 5.24  | 1    | 28   | 3620 |
| BAS Recall Digits                   | 22.34  | 4.31  | 1    | 34   | 3763    | 22.62  | 4.22  | 8    | 34   | 3608 |
| BAS Similarities                    | 12.38  | 2.60  | 0    | 20   | 3746    | 12.00  | 2.42  | 0    | 20   | 3601 |
| BAS Word Definition                 | 10.89  | 5.19  | 0    | 30   | 3760    | 9.86   | 4.74  | 0    | 29   | 3611 |
| <i>Noncognitive Scales (Age 10)</i> |        |       |      |      |         |        |       |      |      |      |
| Locus of control                    | 9.87   | 2.45  | 1.5  | 16   | 3477    | 9.66   | 2.38  | 1.5  | 16   | 3346 |
| Perseverance                        | 27.04  | 11.60 | 1    | 47   | 3777    | 30.08  | 10.80 | 1    | 47   | 3620 |
| Cooperativeness                     | 31.39  | 9.05  | 1    | 47   | 3748    | 32.33  | 8.818 | 1    | 47   | 3586 |
| Completeness                        | 30.98  | 13.72 | 1    | 47   | 3749    | 35.33  | 12.41 | 1    | 47   | 3596 |
| Attentiveness                       | 30.27  | 12.92 | 1    | 47   | 3752    | 33.87  | 12.16 | 1    | 47   | 3581 |
| Persistence                         | 25.84  | 13.78 | 1    | 47   | 3754    | 30.22  | 12.96 | 1    | 47   | 3607 |
| <i>Health Measurements (Age 10)</i> |        |       |      |      |         |        |       |      |      |      |
| Height (cms)                        | 1.39   | 0.06  | 1.18 | 1.61 | 3777    | 1.38   | 0.06  | 1.17 | 1.63 | 3620 |
| Head circumference (mms)            | 539.36 | 17.87 | 318  | 597  | 3690    | 530.64 | 18.05 | 305  | 597  | 3501 |
| Mother height (cms)                 | 161.15 | 6.56  | 124  | 183  | 3774    | 161.51 | 6.65  | 132  | 188  | 3618 |
| Father height (cms)                 | 175.28 | 7.49  | 147  | 211  | 3622    | 149.55 | 62.68 | 0    | 201  | 3616 |

BAS = British Ability Scales.

Source: [Confi et al. \(2010a,b\)](#)

Note: The table displays the unstandardized measurements. Note all measurements have been standardized for the purpose of estimation.

**Table A.3:** Summary Statistics: Covariates

|                                                              | Males |       |      |      | Females |       |       |      |      |      |
|--------------------------------------------------------------|-------|-------|------|------|---------|-------|-------|------|------|------|
|                                                              | Mean  | S.D.  | Min. | Max. | n       | Mean  | S.D.  | Min. | Max. | n    |
| <i>Covariates</i>                                            |       |       |      |      |         |       |       |      |      |      |
| Mother's age at birth                                        | 25.84 | 5.31  | 14   | 52   | 3777    | 25.78 | 5.28  | 15   | 46   | 3620 |
| Mother's education a birth                                   | 0.33  | 0.47  | 0    | 1    | 3777    | 0.34  | 0.47  | 0    | 1    | 3620 |
| # Children at age 10                                         | 2.55  | 1.03  | 1    | 13   | 3777    | 2.54  | 1.03  | 1    | 10   | 3620 |
| Father high SC at birth                                      | 0.29  | 0.45  | 0    | 1    | 3777    | 0.29  | 0.45  | 0    | 1    | 3620 |
| Broken family                                                | 0.12  | 0.32  | 0    | 1    | 3777    | 0.13  | 0.34  | 0    | 1    | 3620 |
| Total gross family income at age 10 <sup>1</sup>             | 4.03  | 1.23  | 1    | 7    | 3777    | 4.06  | 1.25  | 1    | 7    | 3620 |
| Parity                                                       | 1.12  | 1.27  | 0    | 11   | 3777    | 1.11  | 1.29  | 0    | 10   | 3620 |
| <i>Additional Covariates in the Measurement System</i>       |       |       |      |      |         |       |       |      |      |      |
| Weight <sup>2</sup> (kgs)                                    | 32.24 | 4.90  | 23   | 48   | 3777    | 32.80 | 5.62  | 23   | 51   | 3620 |
| Mother weight <sup>2</sup> (kgs)                             | 60.82 | 10.34 | 35   | 164  | 3777    | 61.03 | 10.60 | 29   | 132  | 3620 |
| Father weight <sup>2</sup> (kgs)                             | 75.14 | 10.16 | 41   | 167  | 3777    | 75.34 | 9.89  | 44   | 139  | 3620 |
| <i>Additional Covariate in the Schooling Choice Equation</i> |       |       |      |      |         |       |       |      |      |      |
| Claimant Count                                               | 12.89 | 3.42  | 7.8  | 19.8 | 3777    | 7.77  | 1.48  | 5.2  | 10.1 | 3620 |

Source: [Conti et al. \(2010a,b\)](#)

Note: SC = Social Class. High Social Class comprises SCL, SCII and SCIIINM (Non-Manual) . The BCS70 uses the Registrar General's classification for measuring social class (SC). Social class I includes professionals, such as lawyers, architects and doctors; Social Class II includes intermediate workers, such as shopkeepers, farmers and teachers; Social Class III Non Manual includes skilled non-manual workers, such as shop assistants and clerical workers in offices.

<sup>1</sup> 1=under £35 pw; 2=£35-49 pw; 3=£50-99 pw; 4=£100-149 pw; 5=£150-199 pw; 6=£200-249 pw; 7=£250 or more pw.

<sup>2</sup> Only in the measurement system for health.

**Table A.4:** Measurement System: Cognitive Factor – Males

|                                     | Picture Language<br>Comprehension Test | Friendly<br>Math Test | Shortened Edinburgh<br>Reading Test | BAS<br>Matrices   | BAS<br>Recall Digits | BAS<br>Similarities | BAS<br>Word Definition |
|-------------------------------------|----------------------------------------|-----------------------|-------------------------------------|-------------------|----------------------|---------------------|------------------------|
| Constant                            | -0.516<br>(0.113)                      | -0.814<br>(0.120)     | -0.803<br>(0.118)                   | -0.840<br>(0.122) | -0.699<br>(0.126)    | -0.647<br>(0.122)   | -0.776<br>(0.117)      |
| Father high SC at birth             | 0.284<br>(0.036)                       | 0.364<br>(0.037)      | 0.304<br>(0.037)                    | 0.222<br>(0.038)  | 0.140<br>(0.039)     | 0.303<br>(0.039)    | 0.379<br>(0.038)       |
| Income                              | 0.056<br>(0.013)                       | 0.085<br>(0.014)      | 0.082<br>(0.013)                    | 0.071<br>(0.014)  | 0.034<br>(0.014)     | 0.078<br>(0.014)    | 0.073<br>(0.013)       |
| Broken Family                       | -0.117<br>(0.048)                      | -0.104<br>(0.048)     | -0.069<br>(0.047)                   | -0.048<br>(0.049) | -0.021<br>(0.051)    | -0.071<br>(0.049)   | -0.063<br>(0.048)      |
| Mother's Age                        | 0.226<br>(0.035)                       | 0.197<br>(0.038)      | 0.178<br>(0.036)                    | 0.166<br>(0.037)  | 0.187<br>(0.039)     | 0.185<br>(0.038)    | 0.269<br>(0.037)       |
| Mother stayed in school beyond MSLA | 0.299<br>(0.034)                       | 0.354<br>(0.035)      | 0.367<br>(0.035)                    | 0.328<br>(0.036)  | 0.143<br>(0.037)     | 0.311<br>(0.035)    | 0.343<br>(0.036)       |
| Parity                              | -0.083<br>(0.017)                      | -0.107<br>(0.017)     | -0.113<br>(0.016)                   | -0.084<br>(0.017) | -0.046<br>(0.018)    | -0.090<br>(0.017)   | -0.111<br>(0.017)      |
| Number of children                  | -0.108<br>(0.017)                      | -0.028<br>(0.018)     | -0.053<br>(0.017)                   | 0.002<br>(0.017)  | 0.001<br>(0.018)     | -0.065<br>(0.018)   | -0.082<br>(0.017)      |
| Cognitive Factor                    | 0.820<br>(0.028)                       | 1.273<br>(0.030)      | 1.265<br>(0.030)                    | 1.000<br>(0.000)  | 0.717<br>(0.029)     | 1.028<br>(0.029)    | 1.074<br>(0.030)       |
| Noncognitive Factor                 | 0.000<br>(0.000)                       | 0.000<br>(0.000)      | 0.000<br>(0.000)                    | 0.000<br>(0.000)  | 0.000<br>(0.000)     | 0.000<br>(0.000)    | 0.000<br>(0.000)       |
| Health Factor                       | 0.000<br>(0.000)                       | 0.000<br>(0.000)      | 0.000<br>(0.000)                    | 0.000<br>(0.000)  | 0.000<br>(0.000)     | 0.000<br>(0.000)    | 0.000<br>(0.000)       |
| Precision                           | 1.735<br>(0.043)                       | 3.562<br>(0.117)      | 3.889<br>(0.123)                    | 1.920<br>(0.049)  | 1.254<br>(0.030)     | 1.990<br>(0.052)    | 2.182<br>(0.058)       |

Note: Numbers in parentheses are standard errors. SC: social class. MSLA: minimum school-leaving age. BAS: British Ability Scale.

**Table A.5:** Measurement System: NonCognitive Factor – Males

|                                     | Locus of control  |                   | Perseverance      |                   | Cooperativeness   |                   | Completeness |       | Attentiveness |       | Persistence |       |
|-------------------------------------|-------------------|-------------------|-------------------|-------------------|-------------------|-------------------|--------------|-------|---------------|-------|-------------|-------|
|                                     | Scale             | Scale             | Scale             | Scale             | Scale             | Scale             | Scale        | Scale | Scale         | Scale | Scale       | Scale |
| Constant                            | -0.504<br>(0.125) | -0.647<br>(0.113) | -0.253<br>(0.121) | -0.524<br>(0.116) | -0.774<br>(0.114) | -0.644<br>(0.115) |              |       |               |       |             |       |
| Father high SC at birth             | 0.226<br>(0.040)  | 0.179<br>(0.037)  | 0.045<br>(0.039)  | 0.131<br>(0.037)  | 0.082<br>(0.037)  | 0.126<br>(0.036)  |              |       |               |       |             |       |
| Income                              | 0.047<br>(0.014)  | 0.037<br>(0.013)  | 0.037<br>(0.014)  | 0.035<br>(0.014)  | 0.048<br>(0.013)  | 0.023<br>(0.013)  |              |       |               |       |             |       |
| Broken Family                       | -0.079<br>(0.052) | -0.153<br>(0.046) | -0.150<br>(0.050) | -0.131<br>(0.048) | -0.074<br>(0.047) | -0.105<br>(0.046) |              |       |               |       |             |       |
| Mother's Age                        | 0.167<br>(0.039)  | 0.119<br>(0.035)  | 0.034<br>(0.037)  | 0.068<br>(0.037)  | 0.161<br>(0.036)  | 0.115<br>(0.036)  |              |       |               |       |             |       |
| Mother stayed in school beyond MSLA | 0.276<br>(0.038)  | 0.190<br>(0.035)  | 0.060<br>(0.037)  | 0.130<br>(0.036)  | 0.147<br>(0.035)  | 0.179<br>(0.034)  |              |       |               |       |             |       |
| Parity                              | -0.077<br>(0.018) | -0.067<br>(0.017) | -0.013<br>(0.018) | -0.046<br>(0.017) | -0.092<br>(0.017) | -0.067<br>(0.017) |              |       |               |       |             |       |
| Number of children                  | -0.061<br>(0.019) | -0.012<br>(0.016) | -0.024<br>(0.018) | -0.010<br>(0.017) | 0.004<br>(0.017)  | 0.005<br>(0.017)  |              |       |               |       |             |       |
| Cognitive Factor                    | 0.000<br>(0.000)  | 0.000<br>(0.000)  | 0.000<br>(0.000)  | 0.000<br>(0.000)  | 0.000<br>(0.000)  | 0.000<br>(0.000)  |              |       |               |       |             |       |
| Noncognitive Factor                 | 0.423<br>(0.019)  | 1.000<br>(0.000)  | 0.565<br>(0.019)  | 0.880<br>(0.017)  | 0.917<br>(0.017)  | 0.993<br>(0.016)  |              |       |               |       |             |       |
| Health Factor                       | 0.000<br>(0.000)  | 0.000<br>(0.000)  | 0.000<br>(0.000)  | 0.000<br>(0.000)  | 0.000<br>(0.000)  | 0.000<br>(0.000)  |              |       |               |       |             |       |
| Precision                           | 1.258<br>(0.030)  | 3.830<br>(0.133)  | 1.313<br>(0.032)  | 2.176<br>(0.058)  | 2.674<br>(0.078)  | 3.651<br>(0.128)  |              |       |               |       |             |       |

Note: Numbers in parentheses are standard errors. SC: social class. MSLA: minimum school-leaving age.



**Table A.6:** Measurement System: Health Factor – Males

|                                     | Height            | Head Circumference | Mother's Height   | Father's Height   |
|-------------------------------------|-------------------|--------------------|-------------------|-------------------|
| Constant                            | -0.272<br>(0.086) | -0.304<br>(0.111)  | -0.419<br>(0.085) | -0.410<br>(0.053) |
| Father high SC at birth             | 0.050<br>(0.026)  | 0.055<br>(0.035)   | -<br>(-)          | 0.279<br>(0.033)  |
| Income                              | 0.027<br>(0.010)  | 0.060<br>(0.013)   | 0.084<br>(0.013)  | 0.079<br>(0.013)  |
| Broken Family                       | -0.068<br>(0.035) | 0.032<br>(0.046)   | -<br>(-)          | -<br>(-)          |
| Mother's age                        | 0.070<br>(0.027)  | 0.090<br>(0.034)   | -0.010<br>(0.027) | -<br>(-)          |
| Mother stayed in school beyond MSLA | 0.072<br>(0.026)  | 0.089<br>(0.033)   | 0.245<br>(0.031)  | -<br>(-)          |
| Parity                              | -0.037<br>(0.012) | -0.007<br>(0.016)  | -<br>(-)          | -<br>(-)          |
| Number of children                  | 0.016<br>(0.012)  | 0.016<br>(0.016)   | -<br>(-)          | -<br>(-)          |
| Weight                              | 0.609<br>(0.012)  | 0.369<br>(0.015)   | 0.352<br>(0.014)  | 0.422<br>(0.015)  |
| Cognitive Factor                    | 0.000<br>(0.000)  | 0.000<br>(0.000)   | 0.000<br>(0.000)  | 0.000<br>(0.000)  |
| Noncognitive Factor                 | 0.000<br>(0.000)  | 0.000<br>(0.000)   | 0.000<br>(0.000)  | 0.000<br>(0.000)  |
| Health Factor                       | 1.000<br>(0.000)  | 0.232<br>(0.042)   | 0.965<br>(0.065)  | 0.777<br>(0.057)  |
| Precision                           | 3.672<br>(0.225)  | 1.363<br>(0.032)   | 1.639<br>(0.053)  | 1.539<br>(0.043)  |

Note: Numbers in parentheses are standard errors. SC: social class. MSLA: minimum school-leaving age.

**Table A.7:** Measurement System: Cognitive Factor – Females

|                                     | Picture Language<br>Comprehension Test | Friendly<br>Math Test | Shortened Edinburgh<br>Reading Test | BAS<br>Matrices   | BAS<br>Recall Digits | BAS<br>Similarities | BAS<br>Word Definition |
|-------------------------------------|----------------------------------------|-----------------------|-------------------------------------|-------------------|----------------------|---------------------|------------------------|
| Constant                            | -0.594<br>(0.120)                      | -0.726<br>(0.113)     | -0.634<br>(0.112)                   | -0.635<br>(0.122) | -0.507<br>(0.129)    | -0.821<br>(0.115)   | -0.908<br>(0.114)      |
| Father high SC at birth             | 0.254<br>(0.037)                       | 0.287<br>(0.035)      | 0.265<br>(0.036)                    | 0.192<br>(0.038)  | 0.138<br>(0.041)     | 0.215<br>(0.036)    | 0.276<br>(0.035)       |
| Income                              | 0.082<br>(0.013)                       | 0.098<br>(0.013)      | 0.097<br>(0.013)                    | 0.089<br>(0.014)  | 0.050<br>(0.014)     | 0.100<br>(0.013)    | 0.096<br>(0.013)       |
| Broken Family                       | -0.138<br>(0.045)                      | -0.125<br>(0.045)     | -0.097<br>(0.045)                   | -0.104<br>(0.047) | -0.006<br>(0.049)    | -0.104<br>(0.045)   | -0.084<br>(0.045)      |
| Mother's Age                        | 0.138<br>(0.038)                       | 0.111<br>(0.035)      | 0.164<br>(0.035)                    | 0.109<br>(0.039)  | 0.080<br>(0.041)     | 0.171<br>(0.036)    | 0.204<br>(0.035)       |
| Mother stayed in school beyond MSLA | 0.238<br>(0.034)                       | 0.278<br>(0.034)      | 0.343<br>(0.033)                    | 0.254<br>(0.036)  | 0.220<br>(0.037)     | 0.314<br>(0.034)    | 0.349<br>(0.033)       |
| Parity                              | -0.073<br>(0.017)                      | -0.051<br>(0.016)     | -0.086<br>(0.016)                   | -0.067<br>(0.018) | -0.003<br>(0.018)    | -0.078<br>(0.017)   | -0.088<br>(0.016)      |
| Number of children                  | -0.099<br>(0.017)                      | -0.035<br>(0.017)     | -0.069<br>(0.017)                   | 0.003<br>(0.019)  | 0.009<br>(0.019)     | -0.066<br>(0.017)   | -0.075<br>(0.017)      |
| Cognitive Factor                    | 0.819<br>(0.029)                       | 1.185<br>(0.030)      | 1.210<br>(0.031)                    | 1.000<br>(0.000)  | 0.730<br>(0.030)     | 0.999<br>(0.031)    | 1.010<br>(0.030)       |
| Noncognitive Factor                 | 0.000<br>(0.000)                       | 0.000<br>(0.000)      | 0.000<br>(0.000)                    | 0.000<br>(0.000)  | 0.000<br>(0.000)     | 0.000<br>(0.000)    | 0.000<br>(0.000)       |
| Health Factor                       | 0.000<br>(0.000)                       | 0.000<br>(0.000)      | 0.000<br>(0.000)                    | 0.000<br>(0.000)  | 0.000<br>(0.000)     | 0.000<br>(0.000)    | 0.000<br>(0.000)       |
| Precision                           | 1.713<br>(0.043)                       | 3.763<br>(0.119)      | 4.244<br>(0.141)                    | 1.918<br>(0.050)  | 1.311<br>(0.031)     | 2.299<br>(0.062)    | 2.527<br>(0.069)       |

Note: Numbers in parentheses are standard errors. SC: social class. MSLA: minimum school-leaving age. BAS: British Ability Scale.

**Table A.8:** Measurement System: NonCognitive Factor – Females

|                                     | Locus of control  |                   |                   |                   |                   |                   |
|-------------------------------------|-------------------|-------------------|-------------------|-------------------|-------------------|-------------------|
|                                     | Scale             | Perseverance      | Cooperativeness   | Completeness      | Attentiveness     | Perseverance      |
|                                     | Scale             | Scale             | Scale             | Scale             | Scale             | Scale             |
| Constant                            | -0.761<br>(0.125) | -0.283<br>(0.121) | 0.044<br>(0.128)  | -0.224<br>(0.123) | -0.220<br>(0.122) | -0.146<br>(0.123) |
| Father high SC at birth             | 0.275<br>(0.039)  | 0.208<br>(0.038)  | 0.148<br>(0.040)  | 0.136<br>(0.037)  | 0.148<br>(0.037)  | 0.172<br>(0.038)  |
| Income                              | 0.114<br>(0.014)  | 0.045<br>(0.013)  | 0.016<br>(0.014)  | 0.067<br>(0.014)  | 0.036<br>(0.014)  | 0.037<br>(0.013)  |
| Broken Family                       | -0.096<br>(0.049) | -0.201<br>(0.045) | -0.189<br>(0.050) | -0.142<br>(0.043) | -0.224<br>(0.045) | -0.168<br>(0.046) |
| Mother's Age                        | 0.133<br>(0.040)  | 0.118<br>(0.038)  | 0.002<br>(0.041)  | 0.052<br>(0.039)  | 0.110<br>(0.038)  | 0.076<br>(0.038)  |
| Mother stayed in school beyond MSLA | 0.224<br>(0.037)  | 0.093<br>(0.035)  | 0.033<br>(0.037)  | 0.069<br>(0.035)  | 0.113<br>(0.035)  | 0.107<br>(0.037)  |
| Parity                              | -0.040<br>(0.018) | -0.066<br>(0.017) | -0.014<br>(0.018) | -0.048<br>(0.017) | -0.064<br>(0.017) | -0.047<br>(0.017) |
| Number of children                  | -0.074<br>(0.019) | -0.031<br>(0.018) | -0.029<br>(0.019) | -0.011<br>(0.018) | -0.024<br>(0.018) | -0.030<br>(0.018) |
| Cognitive Factor                    | 0.000<br>(0.000)  | 0.000<br>(0.000)  | 0.000<br>(0.000)  | 0.000<br>(0.000)  | 0.000<br>(0.000)  | 0.000<br>(0.000)  |
| Noncognitive Factor                 | 0.420<br>(0.022)  | 1.000<br>(0.000)  | 0.574<br>(0.022)  | 0.808<br>(0.019)  | 0.945<br>(0.019)  | 0.979<br>(0.018)  |
| Health Factor                       | 0.000<br>(0.000)  | 0.000<br>(0.000)  | 0.000<br>(0.000)  | 0.000<br>(0.000)  | 0.000<br>(0.000)  | 0.000<br>(0.000)  |
| Precision                           | 1.340<br>(0.034)  | 3.780<br>(0.130)  | 1.345<br>(0.033)  | 2.238<br>(0.060)  | 2.893<br>(0.089)  | 3.215<br>(0.105)  |

Note: Numbers in parentheses are standard errors. SC: social class. MSLA: minimum school-leaving age.

**Table A.9:** Measurement System: Health Factor – Females

|                                     | Height            | Head Circumference | Mother's Height   | Father's Height   |
|-------------------------------------|-------------------|--------------------|-------------------|-------------------|
| Constant                            | -0.318<br>(0.088) | -0.408<br>(0.119)  | -0.346<br>(0.088) | -0.455<br>(0.053) |
| Father high SC at birth             | 0.049<br>(0.028)  | 0.096<br>(0.035)   | -<br>(-)          | 0.196<br>(0.034)  |
| Income                              | 0.032<br>(0.011)  | 0.030<br>(0.013)   | 0.076<br>(0.013)  | 0.101<br>(0.013)  |
| Broken Family                       | -0.050<br>(0.034) | -0.126<br>(0.045)  | -<br>(-)          | -<br>(-)          |
| Mother's age                        | 0.049<br>(0.028)  | 0.007<br>(0.038)   | -0.013<br>(0.029) | -<br>(-)          |
| Mother stayed in school beyond MSLA | 0.072<br>(0.027)  | 0.025<br>(0.034)   | 0.257<br>(0.029)  | -<br>(-)          |
| Parity                              | -0.021<br>(0.013) | 0.002<br>(0.017)   | -<br>(-)          | -<br>(-)          |
| Number of children                  | 0.004<br>(0.013)  | 0.000<br>(0.017)   | -<br>(-)          | -<br>(-)          |
| Weight                              | 0.580<br>(0.011)  | 0.334<br>(0.014)   | 0.360<br>(0.015)  | 0.441<br>(0.016)  |
| Cognitive Factor                    | 0.000<br>(0.000)  | 0.000<br>(0.000)   | 0.000<br>(0.000)  | 0.000<br>(0.000)  |
| Noncognitive Factor                 | 0.000<br>(0.000)  | 0.000<br>(0.000)   | 0.000<br>(0.000)  | 0.000<br>(0.000)  |
| Health Factor                       | 1.000<br>(0.000)  | 0.293<br>(0.046)   | 0.848<br>(0.064)  | 0.694<br>(0.057)  |
| Precision                           | 3.369<br>(0.223)  | 1.339<br>(0.032)   | 1.482<br>(0.045)  | 1.561<br>(0.046)  |

Note: Numbers in parentheses are standard errors. SC: social class. MSLA: minimum school-leaving age.

## References

- Conti, G., J. J. Heckman, and S. Urzua (2010a). Early endowments, education, and health. Unpublished manuscript, University of Chicago, Department of Economics.
- Conti, G., J. J. Heckman, and S. Urzua (2010b, May). The education-health gradient. *American Economic Review: Papers & Proceedings* 100(2), 1–5.
- Kaiser, H. F. (1960). The application of electronic computers to factor analysis. *Educational and Psychological Measurement* 20(1), 141–151.
- Velicer, W. F. (1976). Determining the number of components from the matrix of partial correlations. *Psychometrika* 41(3), 321–327.
